# Supplementary material for: Heteroatom-Doped Nickel Sulfide for Efficient Electrochemical Oxygen Evolution Reaction
Source: MDPI journal article supplement (doi:10.3390/en16020881), 2023-01-12
Supplement: s1 [file s1]

## Supplementary Materials

# Heteroatom-Doped Nickel Sulfide for Efficient Electrochemical Oxygen Evolution Reaction

Xingqun Zheng <sup>1,2</sup>, Ling Zhang <sup>2</sup>, Wei He <sup>3</sup>, Li Li <sup>2,\*</sup> and Shun Lu <sup>4,5,\*</sup>

<sup>1</sup> College of Safety Engineering, Chongqing University of Science & Technology, Chongqing 401331, China

<sup>2</sup> State Key Laboratory of Power Transmission Equipment & System Security and New Technology, College of Chemistry and Chemical Engineering, Chongqing University, Chongqing 400044, China

<sup>3</sup> Department of Electrical Engineering and Computer Science, South Dakota State University, Brookings, SD 57007, USA

<sup>4</sup> Department of Agricultural Engineering, South Dakota State University, Brookings, SD 57007, USA

<sup>5</sup> Chongqing Institute of Green and Intelligent Technology, Chinese Academy of Sciences, Chongqing 400714, China

\* Correspondence: liliracial@cqu.edu.cn (L.L.); shun.lu@sdstate.edu (S.L.)

## Content info

### 1. Materials Synthesis

#### 1.1 Materials

#### 1.2 Synthesis of Ni(OH)<sub>2</sub> NSs

#### 1.3 Synthesis Ni<sub>3</sub>S<sub>2</sub> nanosheets and C doped Ni<sub>3</sub>S<sub>2</sub> nanosheets

### 2. Electrochemical Characterizations

### 3. Supporting Figures

### 4. Supporting Tables

## 1. Materials Synthesis

### 1.1 Materials

Nickel foam was purchased from Kunshan Kuangxun Ltd. (China). Pt/C (40% Pt on Vulcan XC-72R) and RuO<sub>2</sub> were purchased from Sigma-Aldrich Chemical Reagent Co., Ltd., and nickel nitrate hexahydrate (Ni(NO<sub>3</sub>)<sub>2</sub>·6H<sub>2</sub>O, 98.0%), ammonium fluoride (NH<sub>4</sub>F, 98.0 %), Sublimed sulfur (S, 99.5%), Sodium hypophosphite monohydrate (NaH<sub>2</sub>PO<sub>2</sub>·H<sub>2</sub>O, 85%) were bought from Shanghai Titan Science &

Technology Co., Ltd. The ultrapure water ( $>18\text{ M}\Omega$ ) was prepared from a Millipore system. All reagents were used as received without any purification.

### **1.2 Synthesis of $\text{Ni}(\text{OH})_2$ NSs**

The nickel hydroxide nanosheets were grown on nickel foam by a hydrothermal method. 1.4 mmol  $\text{Ni}(\text{NO}_3)_2 \cdot 6\text{H}_2\text{O}$ , 2.8 mmol  $\text{NH}_4\text{F}$  and 7 mmol urea were dissolved in 35ml deionized water under vigorous stirring for 30 min. And then, The solution was then transferred into a 50 ml PTFE-lined stainless steel autoclave containing a piece of clean nickel foam ( $1 \times 4\text{ cm}^2$ ). The autoclave was sealed and heated at  $150\text{ }^\circ\text{C}$  for 6 h. Afterwards, the autoclave was cooled to room temperature and then its content was taken out and washed with ethanol and water in turn before being dried at  $60^\circ\text{C}$  in air for 12 h (denoted as  $\text{Ni}(\text{OH})_2$  NSs).

### **1.3 Synthesis $\text{Ni}_3\text{S}_2$ nanosheets and C doped $\text{Ni}_3\text{S}_2$ nanosheets**

Sulfuration of the obtained  $\text{Ni}(\text{OH})_2$  NSs was accomplished in a horizontal quartz tube furnace. Specifically,  $\text{Ni}(\text{OH})_2$  nanosheets (NSs) and sublimed sulfur powder were put individually in two porcelain boats. The boat with sublimed sulfur powder was placed at the upstream end of the furnace and the boat with  $\text{Ni}(\text{OH})_2$  NSs at the other end. The molar ratio of metal to sublimed sulfur powder was 1:10. The furnace was heated to  $350^\circ\text{C}$  at a heating rate of  $5^\circ\text{C min}^{-1}$  and maintained for 2h in  $\text{H}_2/\text{N}_2$  (v/v, 15/85) reduction atmosphere (55 sccm). Then the reaction system was cooled naturally down to room temperature in the furnace to obtain  $\text{Ni}_3\text{S}_2$  NSs. Further, the as prepared  $\text{Ni}_3\text{S}_2$  NSs was annealed at  $400^\circ\text{C}$  in  $\text{CH}_4/\text{N}_2$  (v/v 1:1) for 2 h, and then the reaction system was cooled naturally down to room temperature in the furnace to obtain C doped  $\text{Ni}_3\text{S}_2$  NSs.

## **2. Electrochemical Characterizations**

The electrocatalytic properties of the prepared samples were evaluated with Autolab (Aut72703) electrochemical workstation in a conventional three-electrode system. The C doped  $\text{Ni}_3\text{S}_2$  NSs/Ni,  $\text{Ni}_3\text{S}_2$  NSs/Ni were individually used as the working electrodes, a  $\text{Hg}/\text{HgO}$  electrode (1 M KOH, pH = 13.8) as the reference electrode, and a graphite plate as the counter electrode. The geometric surface area of the working electrode is  $1.0 \times 1.0\text{ cm}^2$ . The  $\text{Hg}/\text{HgO}$  reference electrode was calibrated with respect to RHE according to the previous study: in 1.0 M KOH,  $E_{\text{RHE}} = E_{\text{Hg}/\text{HgO}} + 0.059\text{pH} + 0.098$ . Prior to recording the electroactivity, the catalysts were activated by the continuous scans. Polarization curves were obtained using linear sweep voltammetry (LSV) in 1.0 M KOH with a scan rate of  $1\text{ mV s}^{-1}$  and chronopotentiometric measurements were carried out under different overpotentials. The electrochemical impedance spectroscopy (EIS) was carried out at an overpotential of 100 mV in a frequency range from 100 kHz to 0.01 Hz. The polarization curves were corrected against ohmic potential drop.

### 3. Supporting Figures

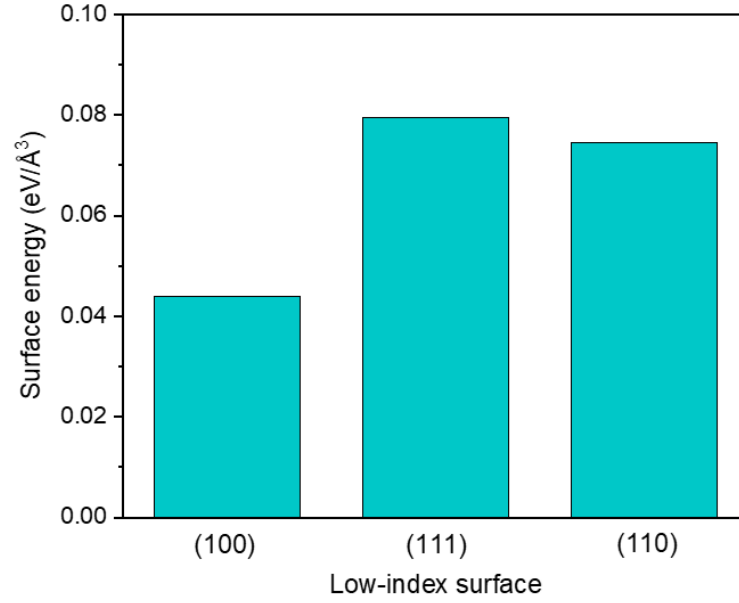

**Figure S1.** The surface energy ( $\delta_s$ ) of (100), (111) and (110) surfaces. (As the (001) and (010) have same structure as (100) and (101) has same structure as (110), we do not consider (001), (010) and (101) anymore. The  $\delta_s$  is calculated according to  $\delta_s = \frac{E_{(slab)} - N_{Ni}\mu_{Ni} - N_S\mu_S}{A}$ , Where  $E_{(slab)}$  is the energy of slab,  $N_{Ni}$ ,  $N_S$  and  $N_X$  represent the number of Ni, S and X atoms respectively, and A is the surface area of a slab).

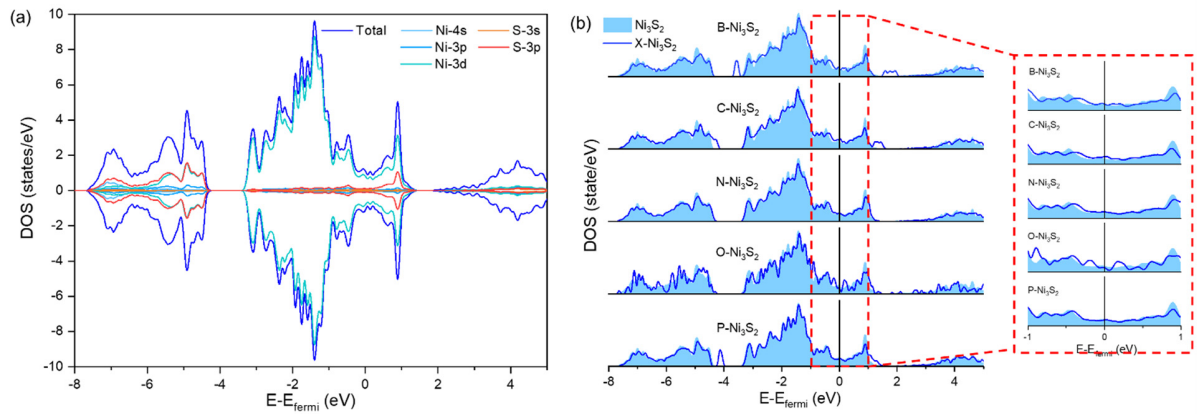

**Figure S2.** (a) The partial density of states for pure  $\text{Ni}_3\text{S}_2$ . (b) The total density of states for X doped  $\text{Ni}_3\text{S}_2$  (only half of DOS is displayed).

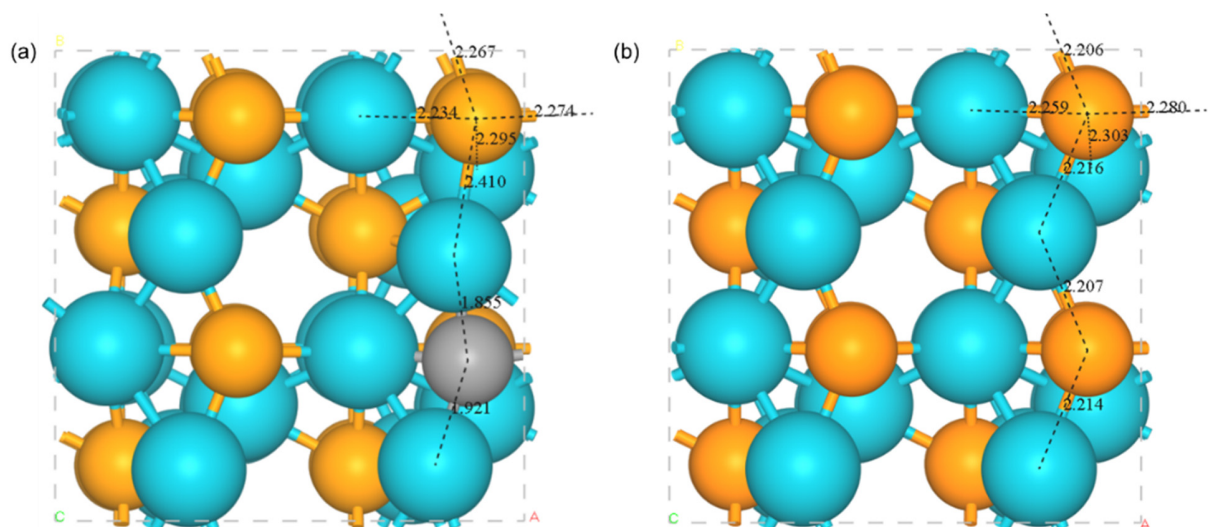

**Figure S3.** the Bond length of S3-Ni and X-Ni bonds on  $C_{out}\text{-Ni}_3\text{S}_2(100)$  and  $\text{Ni}_3\text{S}_2(100)$ .

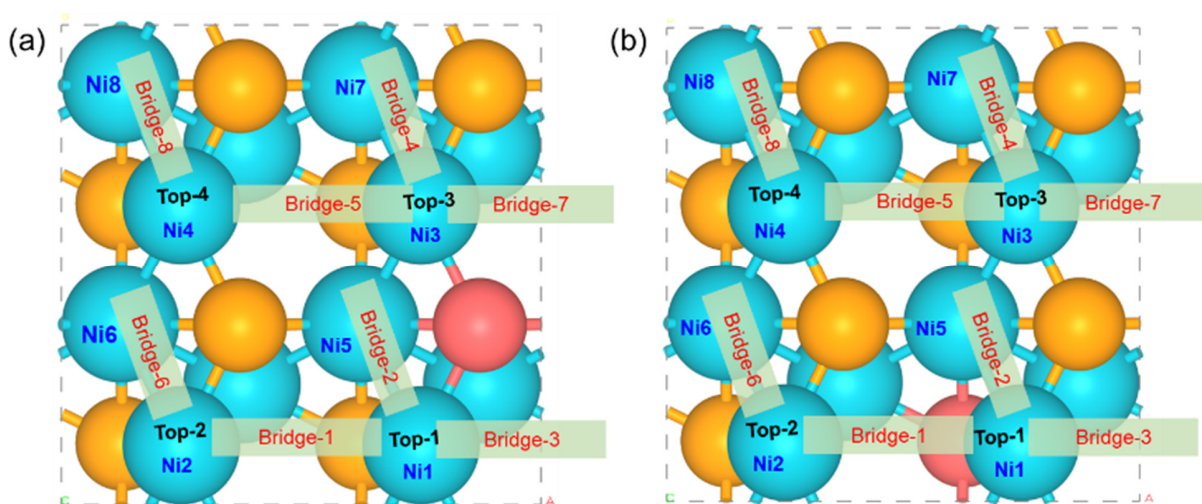

**Figure S4.** The adsorption site on (a)  $X_{out}\text{-Ni}_3\text{S}_2(100)$  surface or pristine  $\text{Ni}_3\text{S}_2(100)$  surface and (b)  $X_{in}\text{-Ni}_3\text{S}_2(100)$  surface. (Top sites are for OH or OOH adsorption, while bridge sites are for O adsorption).

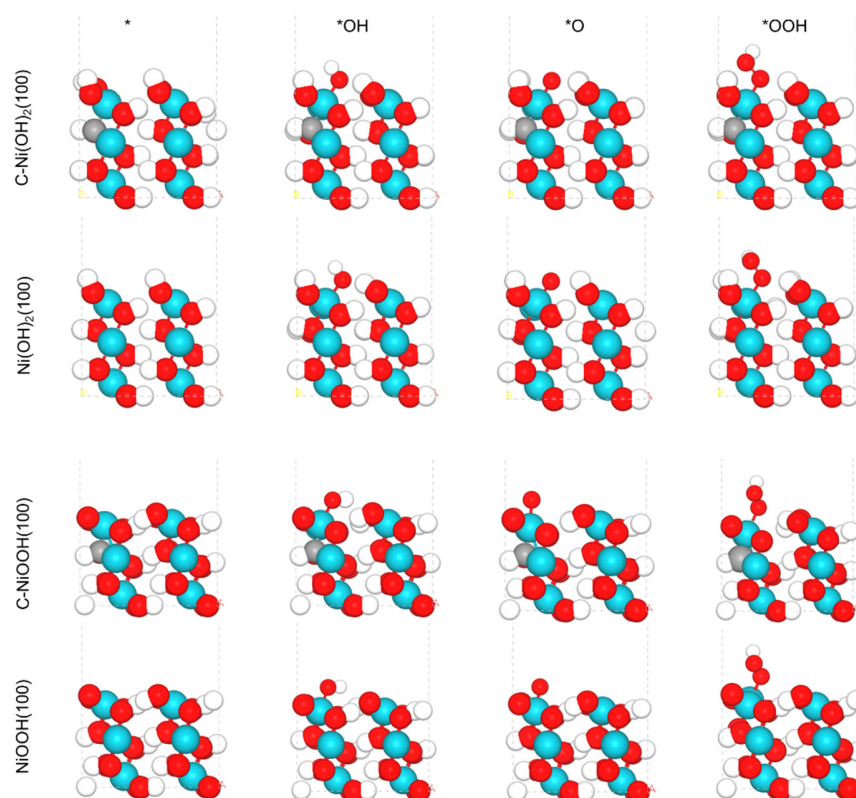

**Figure S5.** The structure of OER intermediats adsorption on prinstin and C doped  $\text{Ni}(\text{OH})_2$  and  $\text{NiOOH}$ .

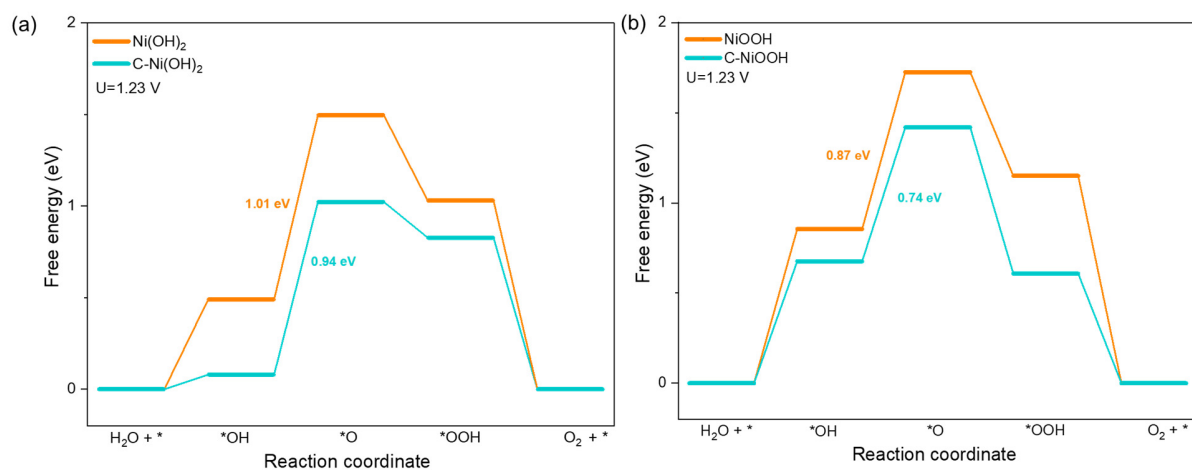

**Figure S6.** (a)-(b) Free energy diagram of OER on pristine and C doped  $\text{Ni}(\text{OH})_2$  and  $\text{NiOOH}$  respectively.

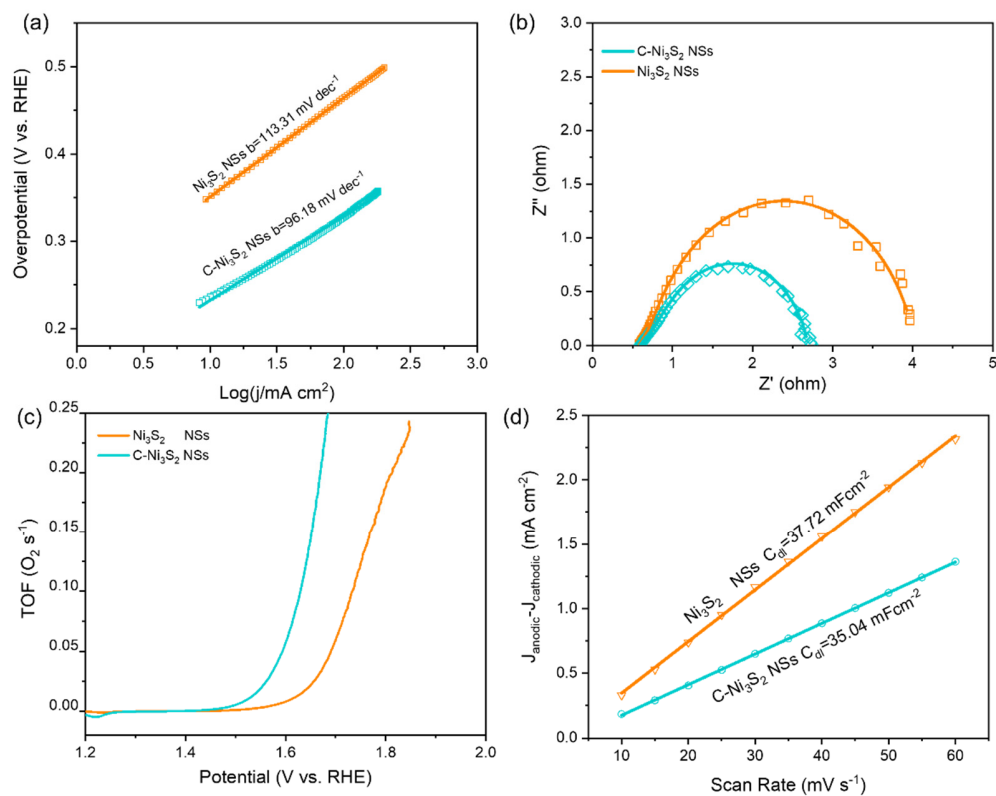

**Figure S7.** (a) The Tafel slop, (b) Nyquist plots obtained by electrochemical impedance spectroscopy. (c) turnover frequency (TOF) and (d) electrochemical double-layer capacitance of C- Ni<sub>3</sub>S<sub>2</sub> NSs and Ni<sub>3</sub>S<sub>2</sub> NSs.

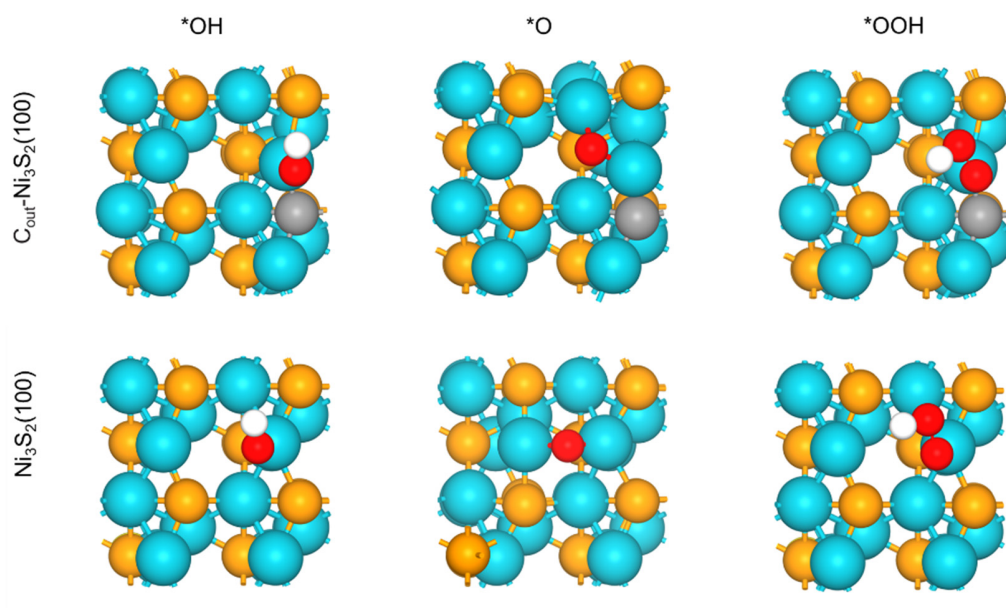

**Figure S8.** The structures of OER intermediates on Ni<sub>3</sub> site of C<sub>out</sub>-Ni<sub>3</sub>S<sub>2</sub>(100) and pristine Ni<sub>3</sub>S<sub>2</sub>(100).

## 4. Supporting Tables

**Table S1.** The bond length of X-Ni1 ( $d_{X-Ni1}$ ) and Ni1-Ni5 ( $d_{Ni1-Ni5}$ ) bonds, corresponding bonds length deviation after X doping ( $\Delta d_{X-Ni1}$  and  $\Delta d_{Ni1-Ni5}$ , more negative value means shorter bond), electronegativity ( $\chi_x$ ) and atom radius ( $R_x$ ) of X.

| Distance                  | B <sub>out</sub> - | C <sub>out</sub> - | N <sub>out</sub> - | O <sub>out</sub> - | P <sub>out</sub> - | B <sub>in</sub> - | C <sub>in</sub> - | N <sub>in</sub> - | O <sub>in</sub> - | P <sub>in</sub> - |
|---------------------------|--------------------|--------------------|--------------------|--------------------|--------------------|-------------------|-------------------|-------------------|-------------------|-------------------|
| $d_{X-Ni1}$ (Å)           | 2.045              | 1.921              | 1.921              | 2.044              | 2.209              | 2.017             | 1.911             | 1.891             | 1.965             | 2.238             |
| $\Delta d_{X-Ni1}$ (Å)    | -0.169             | -0.293             | -0.293             | -0.170             | -0.005             | -0.211            | -0.317            | -0.337            | -0.263            | 0.010             |
| $d_{Ni1-Ni5}$ (Å)         | 2.531              | 2.492              | 2.493              | 2.541              | 2.552              | 2.487             | 2.490             | 2.427             | 2.493             | 2.561             |
| $\Delta d_{Ni1-Ni5}$ (Å)  | -0.040             | -0.079             | -0.078             | -0.030             | -0.019             | -0.084            | -0.081            | -0.144            | -0.078            | -0.010            |
| $d_{Ni1-Ni2}$ (Å)         | 4.253              | 4.284              | 4.252              | 4.156              | 4.107              | 3.937             | 3.755             | 3.738             | 3.831             | 4.075             |
| $\Delta d_{Ni1-Ni2}$ (Å)  | 0.170              | 0.201              | 0.169              | 0.073              | 0.024              | -0.146            | -0.328            | -0.345            | -0.252            | -0.008            |
| $d_{Ni3-Ni4}$ (Å)         | 4.511              | 4.684              | 4.618              | 4.191              | 4.118              | 4.001             | 3.952             | 4.155             | 4.141             | 4.071             |
| $\Delta d_{Ni3-Ni4}$ (Å)  | 0.433              | 0.606              | 0.540              | 0.113              | 0.040              | -0.077            | -0.126            | 0.077             | 0.063             | -0.007            |
| $d_{Ni1-S3}$ (Å)          | 2.232              | 2.267              | 2.265              | 2.244              | 2.206              | 2.178             | 2.204             | 2.232             | 2.203             | 2.198             |
| $\Delta d_{Ni1-S3}$ (Å)   | 0.026              | 0.061              | 0.059              | 0.038              | 0.000              | -0.028            | -0.002            | 0.026             | -0.003            | -0.008            |
| $d_{Ni5-S2}$ (Å)          | 2.339              | 2.364              | 2.344              | 2.247              | 2.288              | 2.220             | 2.235             | 2.286             | 2.310             | 2.264             |
| $\Delta d_{Ni5-S2}$ (Å)   | 0.059              | 0.084              | 0.064              | -0.033             | 0.008              | -0.060            | -0.045            | 0.006             | 0.030             | -0.016            |
| $d_{Ni-S1/S5}$ (Å)        | 2.229              | 2.289              | 2.279              | 2.219              | 2.234              | 2.220             | 2.232             | 2.328             | 2.270             | 2.214             |
| $\Delta d_{Ni-S1/S5}$ (Å) | 0.001              | 0.061              | 0.051              | -0.009             | 0.006              | 0.006             | 0.018             | 0.114             | 0.056             | 0.000             |
| $d_{Ni3-S3}$ (Å)          | 2.310              | 2.410              | 2.419              | 2.270              | 2.222              | 2.204             | 2.212             | 2.249             | 2.276             | 2.203             |
| $\Delta d_{Ni3-S3}$ (Å)   | 0.094              | 0.194              | 0.203              | 0.054              | 0.006              | -0.012            | -0.004            | 0.033             | 0.060             | -0.013            |



**Table S2.** The adsorption free energy of OH, O and OOH on Ni<sub>3</sub>S<sub>2</sub>(100) surface.

|                                                                                   | Intermediates | Site                        | $\Delta G_{ads}$ (eV) |
|-----------------------------------------------------------------------------------|---------------|-----------------------------|-----------------------|
| 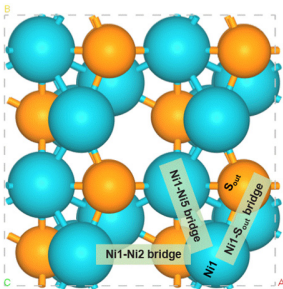 | *OH           | Ni1 top                     | <b>0.73</b>           |
|                                                                                   |               | S <sub>out</sub> top        | 1.92                  |
|                                                                                   | *O            | Ni1 top                     | 2.01                  |
|                                                                                   |               | Ni1-Ni2 bridge              | <b>1.79</b>           |
|                                                                                   |               | Ni1-Ni5 bridge              | 2.40                  |
|                                                                                   |               | Ni1-S <sub>out</sub> bridge | 1.97                  |
|                                                                                   | *OOH          | Ni1 top                     | <b>3.74</b>           |
|                                                                                   |               | S <sub>out</sub> top        | 4.94                  |

**Table S3.** The  $\Delta G_{*OH}$  and  $\Delta G_{*O}$  of C<sub>out</sub>-Ni<sub>3</sub>S<sub>2</sub>(100) and C<sub>in</sub>-Ni<sub>3</sub>S<sub>2</sub>(100) (as examples).

| ites  | $\Delta G_{*OH}$ (eV)                                  |                                                       | Sites    | $\Delta G_{*O}$ (eV)                                   |                                                       |
|-------|--------------------------------------------------------|-------------------------------------------------------|----------|--------------------------------------------------------|-------------------------------------------------------|
|       | C <sub>out</sub> -Ni <sub>3</sub> S <sub>2</sub> (100) | C <sub>in</sub> -Ni <sub>3</sub> S <sub>2</sub> (100) |          | C <sub>out</sub> -Ni <sub>3</sub> S <sub>2</sub> (100) | C <sub>in</sub> -Ni <sub>3</sub> S <sub>2</sub> (100) |
| top-1 | 0.41                                                   | 0.67                                                  | Bridge-1 | 1.57                                                   | 1.97                                                  |
|       |                                                        |                                                       | Bridge-2 | 2.19                                                   | 1.74                                                  |
| top-2 | 0.67                                                   | 1.04                                                  | Bridge-3 | 1.35                                                   | 1.80                                                  |
|       |                                                        |                                                       | Bridge-4 | 2.10                                                   | -                                                     |
| top-3 | 0.77                                                   | 0.62                                                  | Bridge-5 | -                                                      | 1.81                                                  |
|       |                                                        |                                                       | Bridge-6 | -                                                      | 2.55                                                  |
| top-4 | 0.78                                                   | 0.76                                                  | Bridge-7 | 1.18                                                   | 1.75                                                  |
|       |                                                        |                                                       | Bridge-8 | -                                                      | 2.13                                                  |

\*Here, ‘-’ means unstable O adsorption with O moved to another site.

**Table S4.** The comparison of OER activity between catalyst in this work and in recent works.

| Catalysis                            | $\eta$ at 10 mA cm <sup>-2</sup><br>(mV) | Tafel slope<br>(mV dec <sup>-1</sup> ) | Ref.         |
|--------------------------------------|------------------------------------------|----------------------------------------|--------------|
| C-Ni <sub>3</sub> S <sub>2</sub> NSs | 261                                      | 95                                     | This work    |
| NiP/C                                | 290                                      | 74                                     | <sup>1</sup> |
| NiO/NC                               | 420                                      | 61                                     | <sup>2</sup> |
| Mn-Co <sub>3</sub> O <sub>4</sub>    | 332                                      | 60                                     | <sup>3</sup> |



|                                             |     |     |    |
|---------------------------------------------|-----|-----|----|
| NiFe LDH                                    | 290 | 51  | 4  |
| P-Co <sub>3</sub> O <sub>4</sub>            | 280 | 52  | 5  |
| P-Ni <sub>3</sub> S <sub>2</sub>            | -   | 99  | 6  |
| Co <sub>9</sub> S <sub>8</sub> HMs          | 420 | 113 | 7  |
| V-doped NiS <sub>2</sub>                    | 290 | 45  | 8  |
| P-Co-Ni-S/NF                                | 292 | 61  | 9  |
| CuCo <sub>2</sub> S <sub>4</sub> nanosheets | 310 | 86  | 10 |

**Table S5.** Bader charge and b band center of Ni3 site and Ni site of C<sub>out</sub>-Ni<sub>3</sub>S<sub>2</sub>(100) and Ni<sub>3</sub>S<sub>2</sub>(100)

| Systems                                                | Bader charge of Ni3 (e) | d band center of Ni3 (eV) |
|--------------------------------------------------------|-------------------------|---------------------------|
| C <sub>out</sub> -Ni <sub>3</sub> S <sub>2</sub> (100) | 0.43                    | -2.07                     |
| Ni <sub>3</sub> S <sub>2</sub> (100)                   | 0.39                    | -1.79                     |

## References:

- [1] Cheng, X.; Zheng, J.; Li, J.; Luo, X., Synthesis of Flower-Like Carbon-Doped Nickel Phosphides Electrocatalysts for Oxygen Evolution Reaction. *ChemistrySelect* **2019**, 4 (14), 4271-4277.
- [2] Seok, S.; Jang, D.; Kim, H.; Park, S., Production of NiO/N-doped carbon hybrid and its electrocatalytic performance for oxygen evolution reactions. *Carbon Letters* **2020**, 30 (5), 485-491.
- [3] Raj, S.; Anantharaj, S.; Kundu, S.; Roy, P., In situ Mn-doping-promoted conversion of Co (OH) 2 to Co<sub>3</sub>O<sub>4</sub> as an active electrocatalyst for oxygen evolution reaction. *ACS Sustainable Chemistry & Engineering* **2019**, 7 (10), 9690-9698.
- [4] Zhong, H.; Liu, T.; Zhang, S.; Li, D.; Tang, P.; Alonso-Vante, N.; Feng, Y., Template-free synthesis of three-dimensional NiFe-LDH hollow microsphere with enhanced OER performance in alkaline media. *J. Energy Chem.* **2019**, 33, 130-137.
- [5] Xiao, Z.; Wang, Y.; Huang, Y.-C.; Wei, Z.; Dong, C.-L.; Ma, J.; Shen, S.; Li, Y.; Wang, S., Filling the oxygen vacancies in Co<sub>3</sub>O<sub>4</sub> with phosphorus: an ultra-efficient electrocatalyst for overall water splitting. *Energy & Environmental Science* **2017**, 10 (12), 2563-2569.
- [6] Ding, Y.; Li, H.; Hou, Y., Phosphorus-doped nickel sulfides/nickel foam as electrode materials for electrocatalytic water splitting. *Int. J. Hydrogen Energy* **2018**, 43 (41), 19002-19009.
- [7] Zhang, Y.; Chao, S.; Wang, X.; Han, H.; Bai, Z.; Yang, L., Hierarchical Co<sub>9</sub>S<sub>8</sub> hollow microspheres as multifunctional electrocatalysts for oxygen reduction, oxygen evolution and hydrogen evolution reactions. *Electrochim. Acta* **2017**, 246, 380-390.

- [8] Liu, H.; He, Q.; Jiang, H.; Lin, Y.; Zhang, Y.; Habib, M.; Chen, S.; Song, L., Electronic structure reconfiguration toward pyrite NiS<sub>2</sub> via engineered heteroatom defect boosting overall water splitting. *ACS nano* **2017**, *11* (11), 11574-11583.
- [9] Zhang, F.; Ge, Y.; Chu, H.; Dong, P.; Baines, R.; Pei, Y.; Ye, M.; Shen, J., Dual-functional starfish-like P-doped Co–Ni–S nanosheets supported on nickel foams with enhanced electrochemical performance and excellent stability for overall water splitting. *ACS applied materials & interfaces* **2018**, *10* (8), 7087-7095.
- [10] Chauhan, M.; Reddy, K. P.; Gopinath, C. S.; Deka, S., Copper cobalt sulfide nanosheets realizing a promising electrocatalytic oxygen evolution reaction. *ACS Catal.* **2017**, *7* (9), 5871-5879.
